# Supplementary material for: Transposable elements are regulated by context-specific patterns of chromatin marks in mouse embryonic stem cells
Source: PubMed Central journal article supplement (PMC6318327; doi:10.1038/s41467-018-08006-y), 2019-01-03
Supplement: 41467_2018_8006_MOESM2_ESM.pdf [file 41467_2018_8006_MOESM2_ESM.pdf]

**Details of Supplementary Data files**

**Supplementary Data 1.** Details of the ChIP-seq, RNA-seq and ATAC-seq experiments used in this study, including mapping statistics for all libraries generated

**Supplementary Data 2.** Log2 fold enrichment of chromatin modifications for selected and all TE types

**Supplementary Data 3.** Table containing all and a selected list of TE types and their log2 fold-enrichment of bound CMs

**Supplementary Data 4.** Table containing all expressed TE types, and their expression level (normalized tag count) in response shRNA knockdown (RNA-seq)

**Supplementary Data 5.** Table containing all types of TE, and their normalized chromatin expression level (in RPKM), and fold-change in response to shRNA knockdown (ATAC-seq)

**Supplementary Data 6.** shRNA sequences used for the knockdown experiments

**Supplementary Data 7.** Primer sequences for TE RT-qPCR and ChIP-qPCR

**Supplementary Data 8.** Source Data File. File containing the raw numerical data from Figure 1d, 3h and Supplementary Figures 2h and 5b.
